# Supplementary material for: Post-synthetic atomically precise single-CuII sites in a thiacalix[4]arene-supported octahedral Na@Co24 cluster: the Cu–Co synergistic effect for selective photocatalytic conversion of CO2 to CO
Source: Royal Society of Chemistry journal article supplement (doi:10.1039/d3cc01230a), 2023-01-01
Supplement: d3cc01230a1.pdf [file d3cc01230a1.pdf]

**Supplementary Information for:**

**Post-synthetic atomically precise single-Cu<sup>II</sup> sites in a thiacalix[4]arene-supported octahedral Na@Co<sub>24</sub> cluster: the Cu-Co synergistic effect for selective photocatalytic CO<sub>2</sub> to CO**

Yinjuan Guo,<sup>a</sup> Jiahui Li,<sup>a</sup> Guiyan Zhao,<sup>\*a</sup> Baokuan Chen,<sup>a</sup> Xinxin Hang,<sup>\*b</sup> Yanfeng Bi<sup>\*a</sup>

<sup>a</sup> School of Petrochemical Engineering, Liaoning Petrochemical University, Fushun, Liaoning 113001, P. R. China. E-mail: [gyzhao@lnpu.edu.cn](mailto:gyzhao@lnpu.edu.cn) (G. Y. Zhao); [biyanfeng@lnpu.edu.cn](mailto:biyanfeng@lnpu.edu.cn) (Y. F. Bi).

<sup>b</sup> School of Chemistry and Chemical Engineering, Institute for Innovative Materials and Energy, Yangzhou University, Yangzhou, Jiangsu 225002, P. R. China. E-mail: [hangxinxin@yzu.edu.cn](mailto:hangxinxin@yzu.edu.cn) (X. X. Hang)

## Experimental Section

**Materials and Characterization.** *p-tert*-Butylthiacalix[4]arene was synthesized by a previously reported procedure,<sup>1</sup> and other reagent-grade chemicals were purchased from commercial sources and used without further purification. Thermal gravimetric analysis (TGA) was performed on a TA Q600 TGA thermogravimetric analyzer. X-ray photoelectron spectroscopic (XPS) measurements were carried out on an ESCALAB 250Xi using a monochromic Al K $\alpha$  X-ray source (1486.6 eV). UV-vis spectra were recorded on an Agilent Cary5000 Spectrometer. Fourier transform infrared (FT-IR) spectra using KBr pellets were taken on a Perkin Elmer Spectrum GX spectrometer. The electrochemical measurements were conducted on a CHI660E (Chenhua, Shanghai) electrochemical workstation. Inductively coupled plasma atomic emission spectroscopy (ICP-AES, Elan DRC-e Plasma mass spectrometer) was performed to investigate the molar ratio of Co and Cu in the mixed-metal cluster.

**X-ray Crystal Structure Determination.** The intensity data were recorded on a Bruker D8 QUEST with Mo-K $\alpha$  radiation ( $\lambda = 0.71073$  Å). The crystal structure was solved using direct methods and refined by employing full-matrix least squares on  $F^2$  (SHELXTX-2014).<sup>2</sup> All non-hydrogen atoms were refined anisotropically except for solvent molecules, and hydrogen atoms of the organic ligands were generated theoretically onto the specific atoms and refined isotropically with fixed thermal factors. The diffraction data were treated by the “SQUEEZE” method as implemented in PLATON,<sup>3</sup> which significantly improved the crystal data. CCDC numbers 2247793 (Na@Co<sub>24</sub>), and 2247794 (Cu@Co<sub>24</sub>) contain the supplementary crystallographic data for this paper, which are available free from the Cambridge Crystallography Data Centre (CCDC).

Determine the solvent molecules in Na@Co<sub>24</sub>:

The residual electron density of Na@Co<sub>24</sub> was treated as diffuse contributions using the program *SQUEEZE*. There are a series of voids (total 12917 Å<sup>3</sup>) with 2756 estimated electrons occupied by solvents (DMF or CH<sub>3</sub>OH). 67 DMF (40 e<sup>-</sup>) and 4 CH<sub>3</sub>OH (18 e<sup>-</sup>) per unit cell were determined by analysis of electron numbers, the size, and the position of the void. As there are two formula units in one cell ( $Z = 2$ ), DMF is approximately

37.5 (incorporating 4 DMF structurally confirmed) and CH<sub>3</sub>OH is 2 for each formula. These solvent molecules are included in the sum formula, formula weight, calculated density,  $\mu$  and  $F(000)$ , respectively. The *TENTATIVE* formula for Na@Co<sub>24</sub> is H<sub>2</sub>[Co<sub>24</sub>Cl<sub>6</sub>(TC4A)<sub>6</sub>(2,4,6-PTC)<sub>8</sub>Na<sub>4</sub>(H<sub>2</sub>O)<sub>8</sub>] (DMF)<sub>37.5</sub> (CH<sub>3</sub>OH)<sub>2</sub>

#### # SQUEEZE RESULTS (APPEND TO CIF)

# Note: Data are Listed for all Voids in the P1 Unit Cell

# i.e. Centre of Gravity, Solvent Accessible Volume,

# Recovered number of Electrons in the Void and

# Details about the Squeezed Material

loop\_

\_platon\_squeeze\_void\_nr

\_platon\_squeeze\_void\_average\_x

\_platon\_squeeze\_void\_average\_y

\_platon\_squeeze\_void\_average\_z

\_platon\_squeeze\_void\_volume

\_platon\_squeeze\_void\_count\_electrons

\_platon\_squeeze\_void\_content

|   |        |       |        |       |           |
|---|--------|-------|--------|-------|-----------|
| 1 | 0.000  | 0.000 | 0.000  | 411   | 142 '' *  |
| 2 | -0.001 | 0.502 | -0.001 | 11917 | 2432 '' ★ |
| 3 | 0.000  | 0.000 | 0.500  | 89    | 20 '' ※   |
| 4 | 0.500  | 0.500 | 0.500  | 411   | 142 '' *  |
| 5 | 0.500  | 0.500 | 0.000  | 89    | 20 '' ※   |

\_platon\_squeeze\_details

\* Possibly occupied by three DMF and one CH<sub>3</sub>OH molecules.

★ Possibly occupied by 67 DMF combined with TGA experiment.

※ Possibly occupied by one CH<sub>3</sub>OH molecule

Determine the solvent molecules in Cu@Co<sub>24</sub>:

The residual electron density of Cu@Co<sub>24</sub> was treated as diffuse contributions using the program *SQUEEZE*. There are a series of voids (total 12830.9 Å<sup>3</sup>) with 3289 estimated electrons occupied by solvents. By analysis of electron numbers, the size and position of the void, it is indicated that voids 2, 4, and 6 in-between two clusters cannot stably accommodate CHCl<sub>3</sub> which leads to the easy release of solvents at ambient conditions. The voids 3, 5, 8, and 9 are located in the calixarene cavities, being the efficient sites to encapsulate CHCl<sub>3</sub>. 51 CHCl<sub>3</sub> (58 e-), 10 CH<sub>3</sub>OH (18 e-), and 8 H<sub>2</sub>O (10 e-) per unit cell were determined. As there are two formula units in one cell ( $Z = 2$ ), CHCl<sub>3</sub>, CH<sub>3</sub>OH, and

H<sub>2</sub>O are calculated to be 25.5, 5, and 4 for each formula, respectively. The presence of both chloroform and water is not inconsistent in this system, because chloroform is outside the cage, and water and methanol are inside the cage. These solvent molecules are included in the sum formula, formula weight, calculated density,  $\mu$  and  $F(000)$ , respectively. TGA indicated the loss of solvents even at ambient conditions. The TENTATIVE formula for Cu@Co<sub>24</sub> is [Co<sub>24</sub>Cl<sub>6</sub>(TC4A)<sub>6</sub>(2,4,6-TCP)<sub>8</sub>Cu<sub>2.5</sub>Na(H<sub>2</sub>O)<sub>3.5</sub>](CHCl<sub>3</sub>)<sub>25.5</sub>(CH<sub>3</sub>OH)<sub>5</sub>(H<sub>2</sub>O)<sub>4</sub>.

# # SQUEEZE RESULTS (APPEND TO CIF)

# Note: Data are Listed for all Voids in the P1 Unit Cell

# i.e. Centre of Gravity, Solvent Accessible Volume,

# Recovered number of Electrons in the Void and

# Details about the Squeezed Material

loop\_

\_platon\_squeeze\_void\_nr

\_platon\_squeeze\_void\_average\_x

\_platon\_squeeze\_void\_average\_y

\_platon\_squeeze\_void\_average\_z

\_platon\_squeeze\_void\_volume

\_platon\_squeeze\_void\_count\_electrons

\_platon\_squeeze\_void\_content

|   |        |       |       |       |           |
|---|--------|-------|-------|-------|-----------|
| 1 | 0.000  | 0.000 | 0.000 | 489   | 152 '' *  |
| 2 | -0.001 | 0.492 | 0.000 | 12060 | 2375 '' ★ |
| 3 | 0.000  | 0.000 | 0.326 | 172   | 57 '' §   |
| 4 | 0.000  | 0.000 | 0.500 | 572   | 190 '' ※  |
| 5 | 0.000  | 0.000 | 0.674 | 172   | 58 '' §   |
| 6 | 0.500  | 0.500 | 0.000 | 572   | 190 '' ※  |
| 7 | 0.500  | 0.500 | 0.500 | 489   | 152 '' *  |
| 8 | 0.500  | 0.500 | 0.174 | 172   | 58 '' §   |
| 9 | 0.500  | 0.500 | 0.825 | 172   | 57 '' §   |

\_platon\_squeeze\_details

\* Possibly occupied by four CH<sub>3</sub>OH (18 e-) and eight H<sub>2</sub>O (10 e-) molecules.

★ Possibly occupied by 41 CHCl<sub>3</sub> (58 e-) combined with the TGA experiment.

※ Possibly occupied by three CHCl<sub>3</sub> (58 e-) and one CH<sub>3</sub>OH (18 e-) molecules

§ Possibly occupied by one CHCl<sub>3</sub> (58 e-) molecule

### Synthesis of Na@Co<sub>24</sub>

Purple block crystals of Na@Co<sub>24</sub> were synthesized and crystallized from a mixture of *p*-*tert*-butylthiacalix[4]arene (0.072 g, 0.1 mmol), Co(Ac)<sub>2</sub>·4H<sub>2</sub>O (0.1 g, 0.4 mmol), 2,4,6-H<sub>3</sub>TCP (0.02 g, 0.076 mmol), NaCl (0.0045 g, 0.076 mmol), CH<sub>3</sub>OH (5 mL), and DMF (5 mL) in a 23 mL Teflon-lined autoclave, which was heated from 20 °C to 130 °C, maintained at 130 °C for 3 days, and then cooled to 20 °C. The crystals were isolated by filtration and then washed with CH<sub>3</sub>OH: DMF (1:1, v/v). Yield: *ca.* 60% with respect to H<sub>4</sub>TC4A.

### Synthesis of Cu@Co<sub>24</sub>

In a typical synthesis, the crystals of Na@Co<sub>24</sub> (30 mg, *ca.* 0.005 mmol) were dissolved in 6 mL CHCl<sub>3</sub>. Then, Cu(NO<sub>3</sub>)<sub>2</sub>·3H<sub>2</sub>O (*ca.* 0.05 mmol) solution dissolved in CH<sub>3</sub>OH was added dropwise to the above solution. After stirring for 30 min, 4 mL CH<sub>3</sub>OH was added into the resultant solution and stirred for 10 h. After that, the brown solution was filtered into a glass vial and kept at ambient conditions. After a week, brown crystals were obtained. The crystals were washed with cold CH<sub>3</sub>OH quickly and dried in the air. Yield: *ca.* 26.83% based on Na@Co<sub>24</sub>.

**Photocatalytic Activity Tests.** The photocatalytic reduction of CO<sub>2</sub> was investigated in a 200 mL quartz reactor. A 30W LED lamp was used as the light source. To eliminate the heat effect of irradiation, circulating cold water flows through the reactor to make the reaction temperature kept on 25 °C. Before the photocatalytic reaction test, 30 mg photocatalyst (dry in a vacuum at 80 °C for 10h) was spread onto a square quartz plate with a side of 2 cm and then loaded onto the reactor. After that, the reactor was purged with Ar gas to ensure air removal. Subsequently, CO<sub>2</sub> (99.99%) bubbled through the water and was followed into the reactor for 1.5 h to guarantee the reactor was filled with the mixed CO<sub>2</sub> and H<sub>2</sub>O vapor. The gas product was analyzed per hour by a gas chromatograph (GC-7920) equipped with both a thermal conductivity detector (TCD) and a flame ionization detector (FID).

**Electrochemical Analysis.** Photoelectrochemical (PEC) measurements were performed on an electrochemical workstation (CHI660E) in a standard three-electrode cell using a Pt wire and an Ag/AgCl electrode (saturated KCl) as the counter and reference electrodes,

respectively. The working electrode was prepared on fluorine-doped tin oxide (FTO) glass with its boundary being protected by Scotch tape. The as-synthesized powder (2 mg) was dispersed into 0.4 mL of C<sub>2</sub>H<sub>5</sub>OH under sonication for 30 min to obtain a colloidal dispersion. The dispersion was drop-casted onto the FTO glass. After natural air drying, the uncoated part of the FTO glass was isolated with epoxy resin glue. Na<sub>2</sub>SO<sub>4</sub> aqueous solution (0.2M, pH = 6.8) was used as an electrolyte. A solar simulator was utilized as a light source for the measurements. Nyquist plots were recorded over the frequency range of 100 MHz to 100kHz at a bias of 0.2 V.

**In-situ FT-IR Measurements.** In-situ FT-IR measurements were carried out on PE GX Spectrum equipped with a volume and gas control system. All spectra were obtained with a resolution of 4.0 cm<sup>-1</sup> and an accumulation time of 5s. Before the measurement, a vacuum pump was used to evacuate all the gases from the reaction chamber for 20 min. Then, the background spectrum in the presence of the sample was collected. After that, CO<sub>2</sub> and H<sub>2</sub>O vapor, as reaction gases, were introduced into the reaction chamber through the gas valve. Next, the FT-IR spectra were recorded as a function of time, in which a 30W spot LED light was used to illuminate the sample.

## References

- 1 N. Iki, C. Kabuto, T. Fukushima, H. Kumagai, H. Takeya, S. Miyanari, T. Miyashi and S. Miyano, *Tetrahedron*, 2000, **56**, 1437-1443.
- 2 G. M. Sheldrick, *Acta Crystallogr., Sect. A: Found Adv*, 2015, **71**, 3-8.
- 3 A. L. Spek, *Acta Crystallogr., Sect. C: Struct. Chem.*, 2015, **71**, 9-18.

## Additional Scheme and Figures

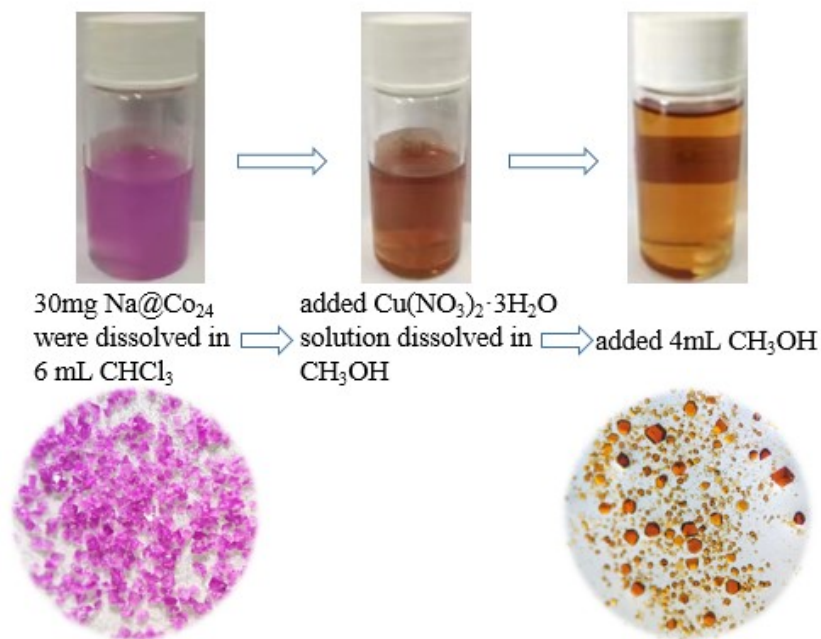

**Scheme S1** Schematic illustration of the synthesis of Cu@Co<sub>24</sub>

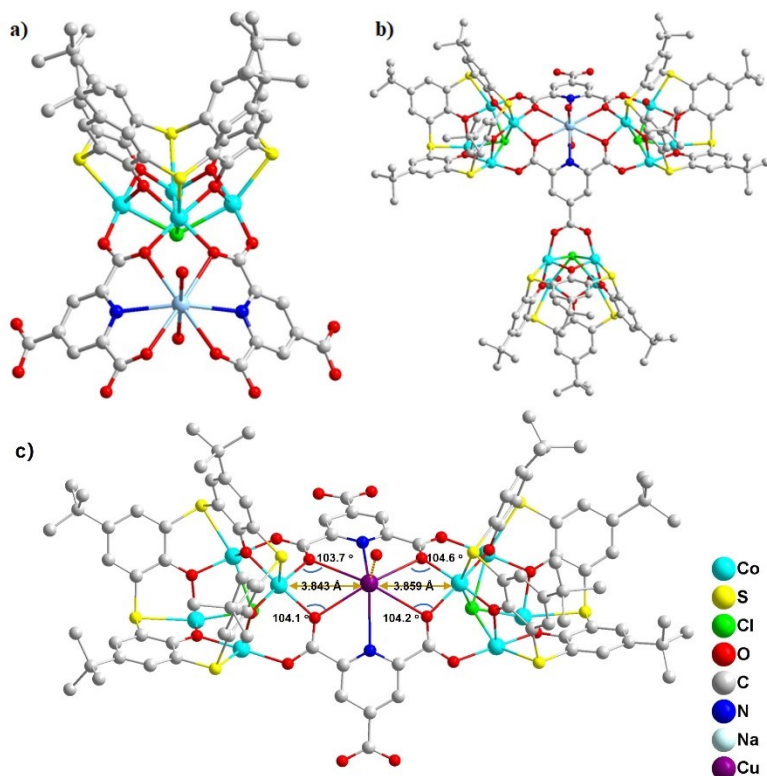

**Fig. S1** (a) The coordination environments of metal ions, (b) the link mode between Co<sub>4</sub>-TC4A PSBUs and 2,4,6-PTC, and (c) the Co...Cu length and Co-O<sub>carboxyl</sub>-Cu angle in the Cu@Co<sub>24</sub> cluster.

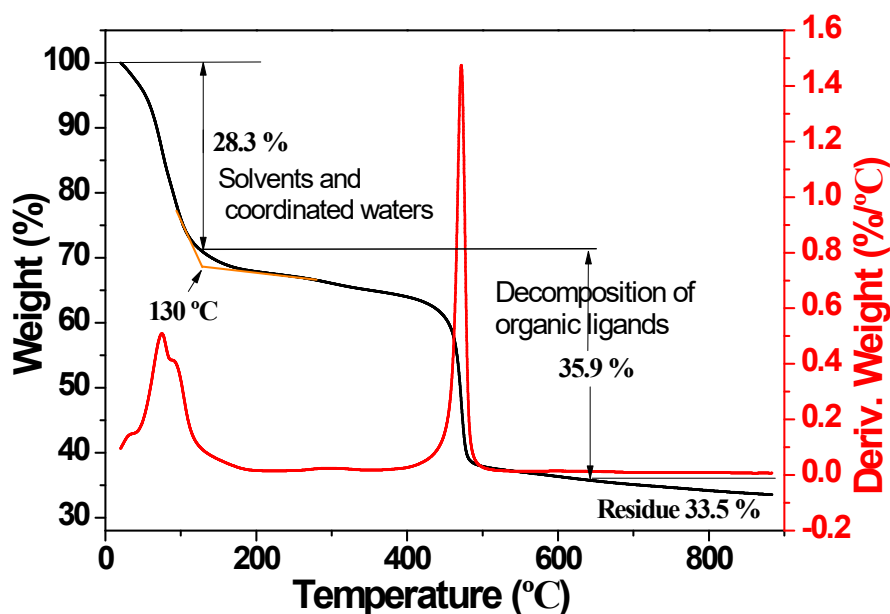

**Fig. S2** The TGA curve of Na@Co<sub>24</sub> recorded in N<sub>2</sub> at 20 mL/min with a heating rate of 10 °C /min.

Na@Co<sub>24</sub> The sample loses about 28.3% weight from room temperature to 130 °C. This weight change is mainly attributed to volatilizing solvent molecules (including DMF, methanol, and weakly coordinated water). This assignment agreed with the one from the SQUEEZE result. The decomposition of the compound skeleton begins at about 400 °C, and the final residue fraction is 33.5%.

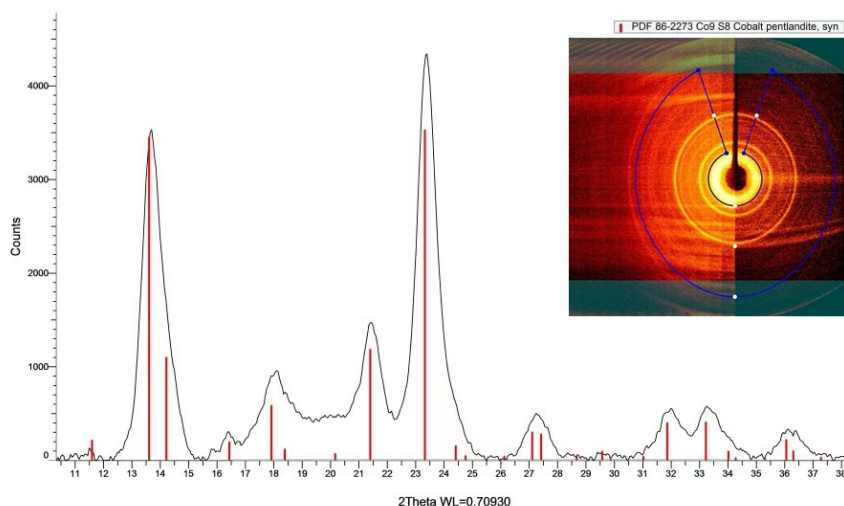

**Fig. S3** The PXRD of Na@Co<sub>24</sub> after TGA (the final decomposition sample). The final decomposition product at 900 °C was found to be Co<sub>9</sub>S<sub>8</sub>.

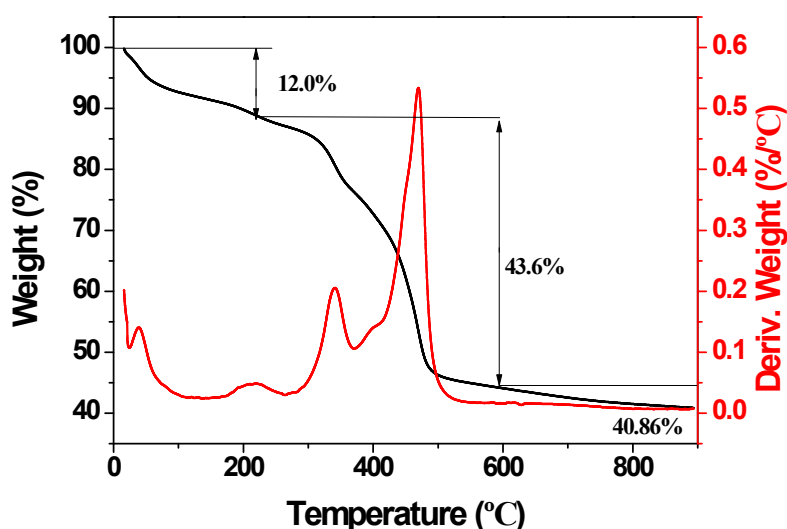

**Fig. S4** The TGA curve of Cu@Co<sub>24</sub> recorded in N<sub>2</sub> at 20 mL/min with a heating rate of 10 °C /min.

The ratio of weight loss from room temperature to 200 °C of Cu@Co<sub>24</sub> is only about 12%, which is smaller than the ratio of weight loss of solvent molecules as a result of *SQUEEZE* determination. This indicates that Cu@Co<sub>24</sub> tends to lose solvent molecules (such as chloroform, methanol, etc) and crystallization at room temperature. Compared with Na@Co<sub>24</sub>, Cu@Co<sub>24</sub> shows an obvious exothermic peak at about 340 °C, which is related to the incorporation of copper. The residue characterization also indicates the presence of copper (Fig. S5).

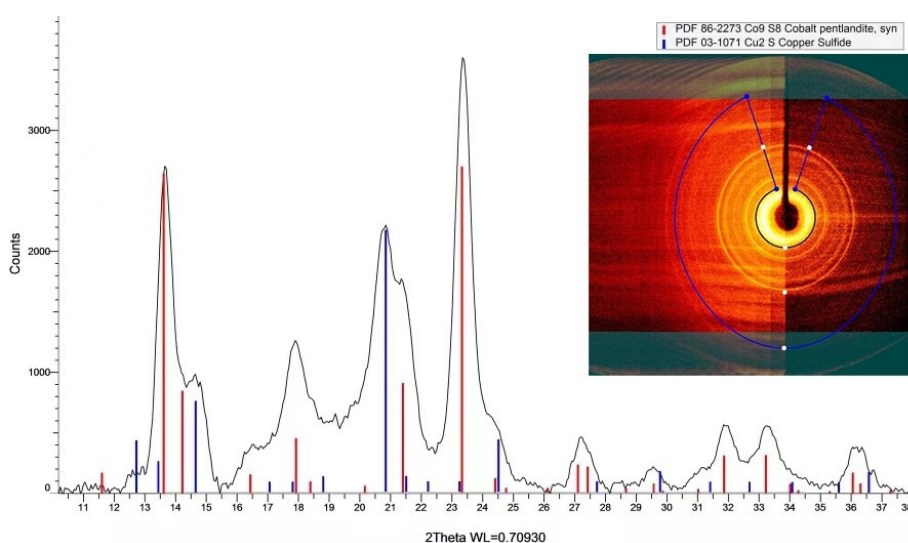

**Fig. S5** The PXRD of Cu@Co<sub>24</sub> after TGA (the final decomposition sample). The final decomposition product at 900 °C was found to be a mixture of Co<sub>9</sub>S<sub>8</sub> and Cu<sub>2</sub>S.

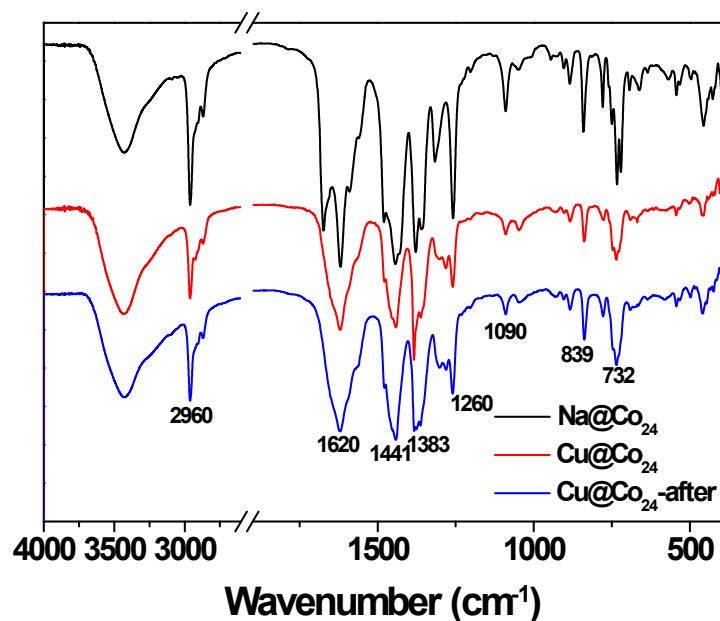

**Fig. S6** FT-IR spectra of Na@Co<sub>24</sub>, Cu@Co<sub>24</sub>, and Cu@Co<sub>24</sub> after 4 cycles of photocatalysis. The main characteristic peaks corresponding to calixarene and carboxylate were found and kept unchanged.

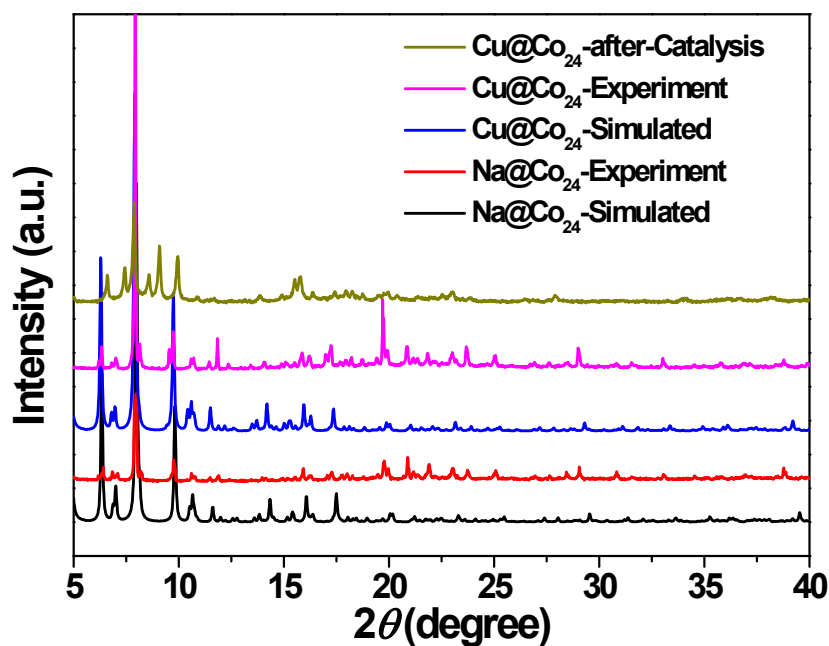

**Fig. S7** PXRD patterns of Na@Co<sub>24</sub>, Cu@Co<sub>24</sub>, and Cu@Co<sub>24</sub> after 4 cycles of photocatalysis.

The experiment PXRD plot is well accordant with the one from single crystal determination for both Na@Co<sub>24</sub> and Cu@Co<sub>24</sub>, respectively. However, Cu@Co<sub>24</sub> lose its initial crystallinity after the experiment. The structure stability of Cu@Co<sub>24</sub> after reaction can be determined by XPS and EDS.

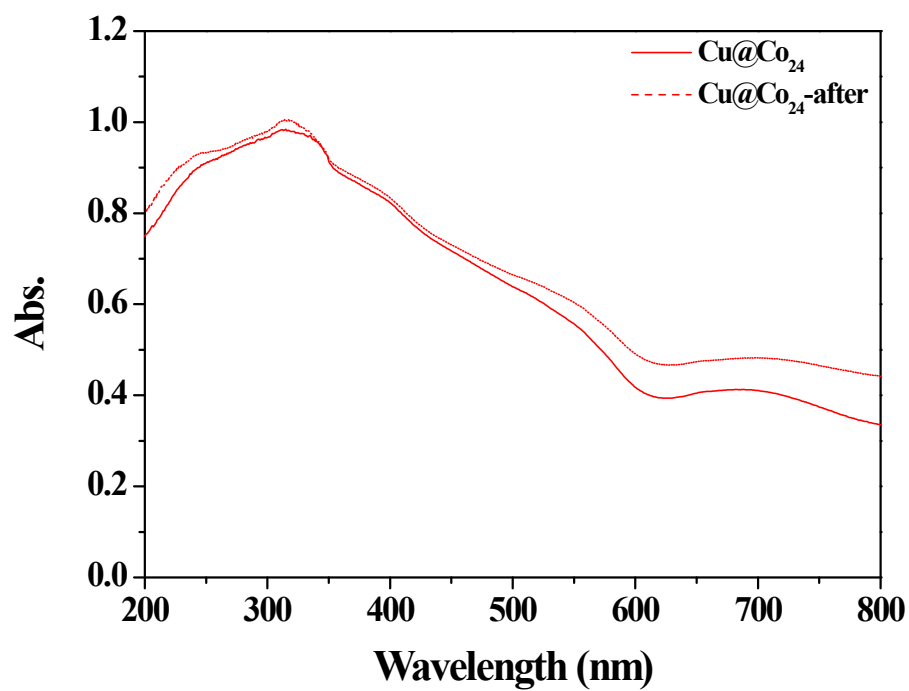

**Fig. S8** Solid-state UV-vis spectra of Cu@Co<sub>24</sub> and Cu@Co<sub>24</sub> after 4 cycles of photocatalysis.

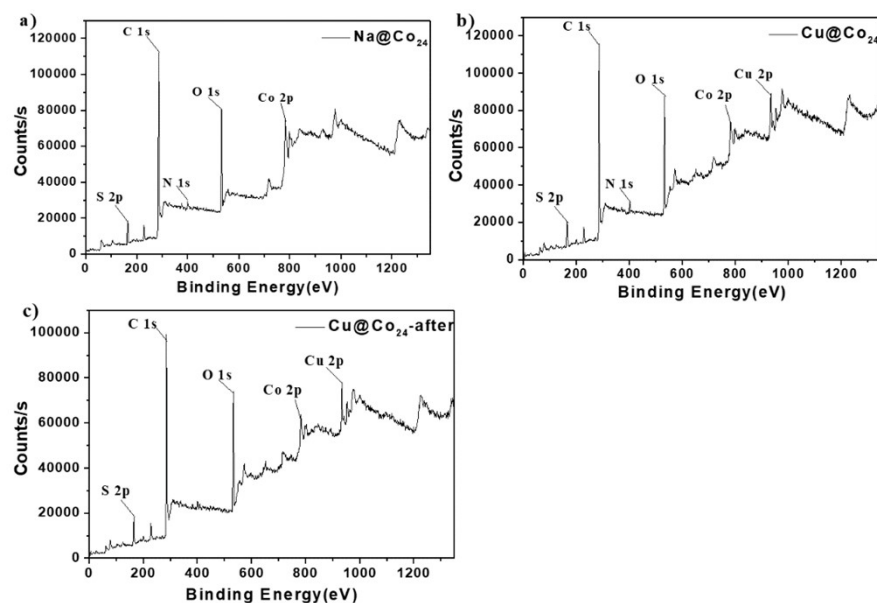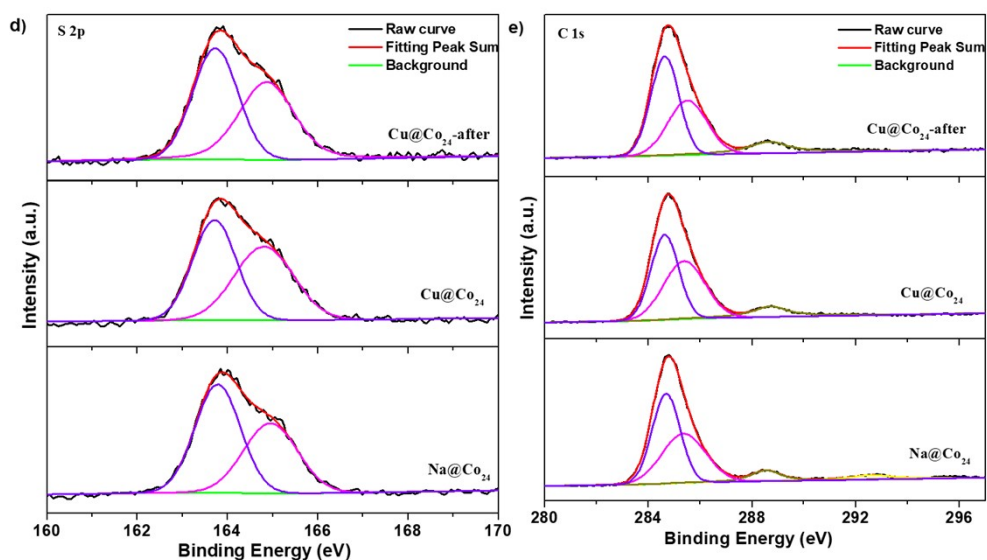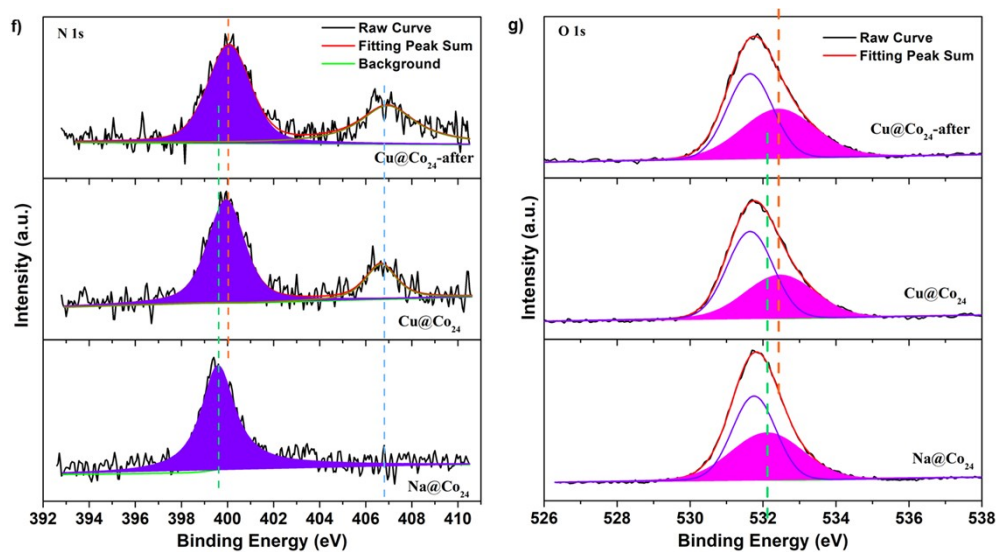

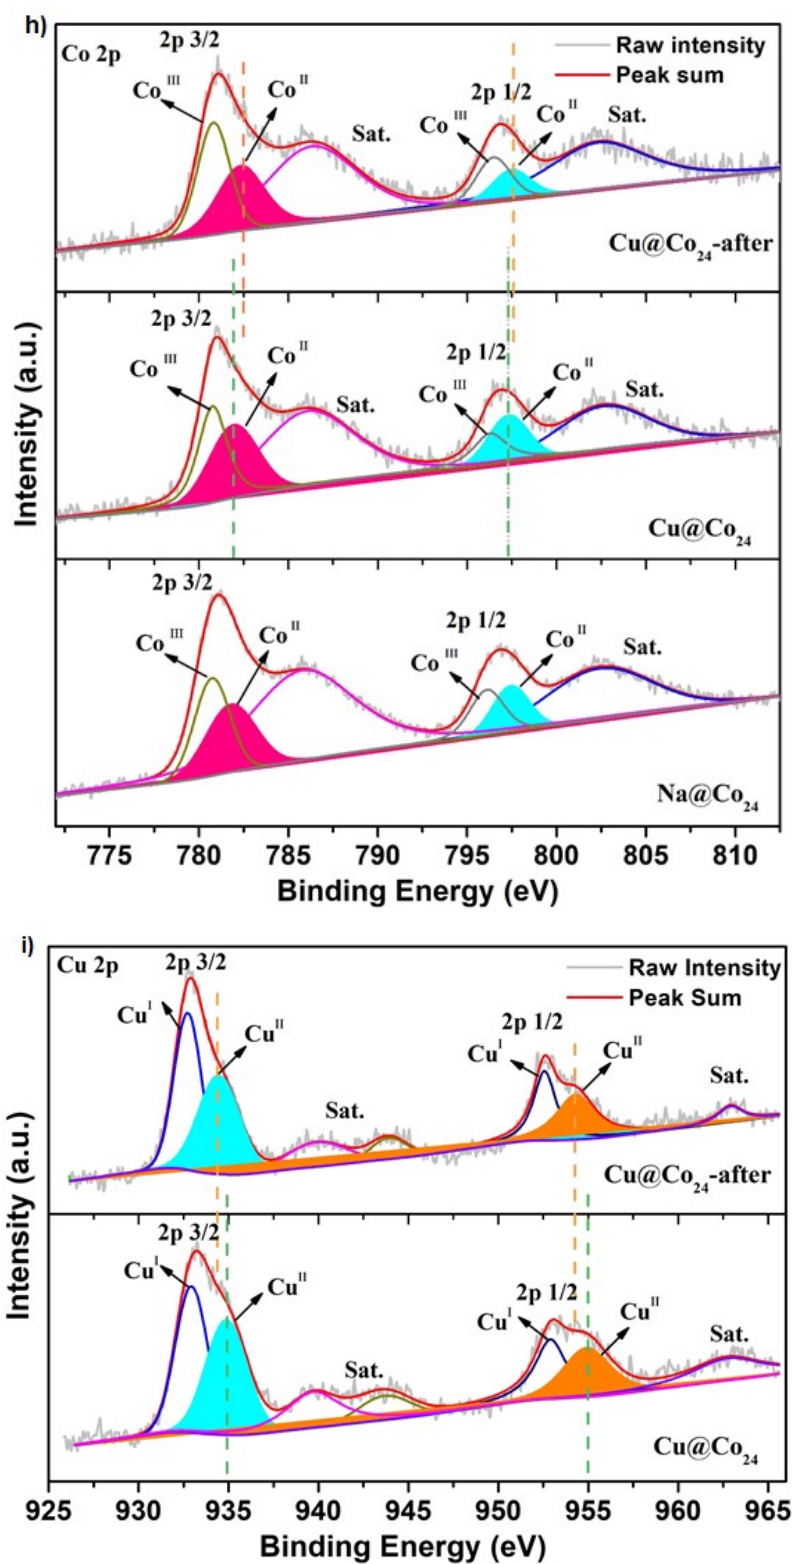

**Fig. S9** XPS survey of Na@Co<sub>24</sub> (a), Cu@Co<sub>24</sub> (b), and Cu@Co<sub>24</sub> after 4 cycles of photocatalysis (c) and Corresponding high-resolution for S2p (d), C1s (e), N1s (f), and O1s (g), Co2p (h), Cu2p (i).

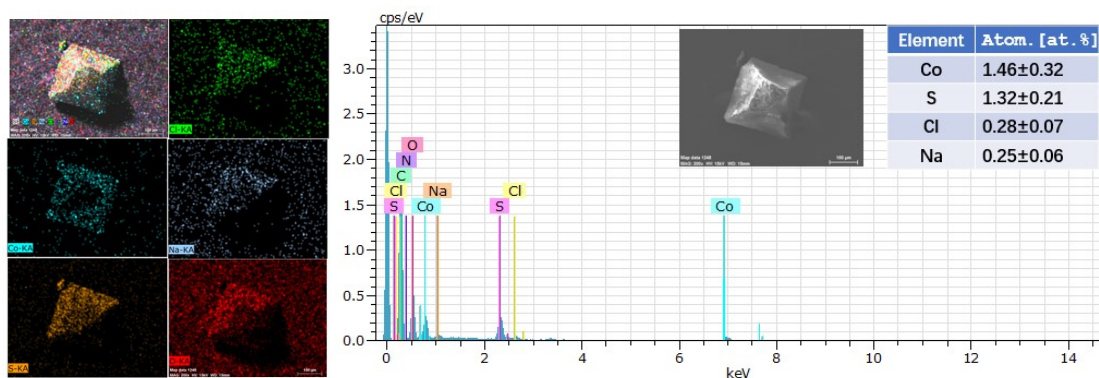

**Fig. S10** The EDS pattern of Na@Co<sub>24</sub>

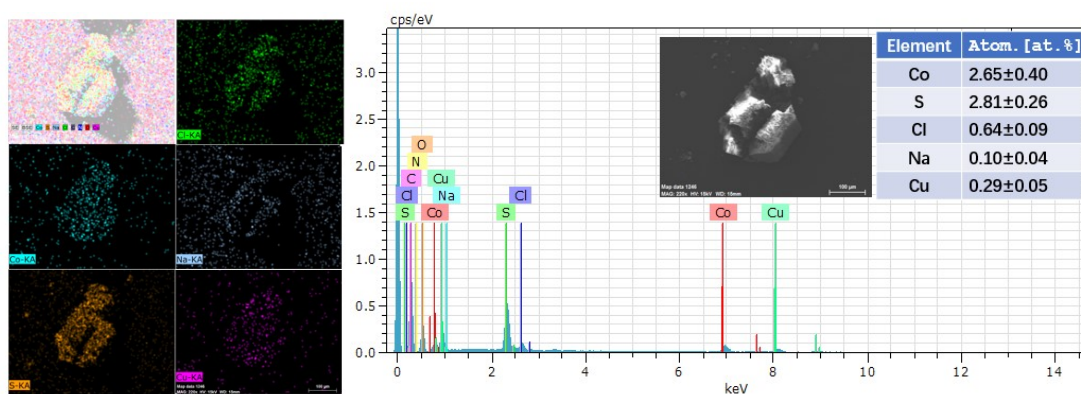

**Fig. S11** The EDS pattern of Cu@Co<sub>24</sub>

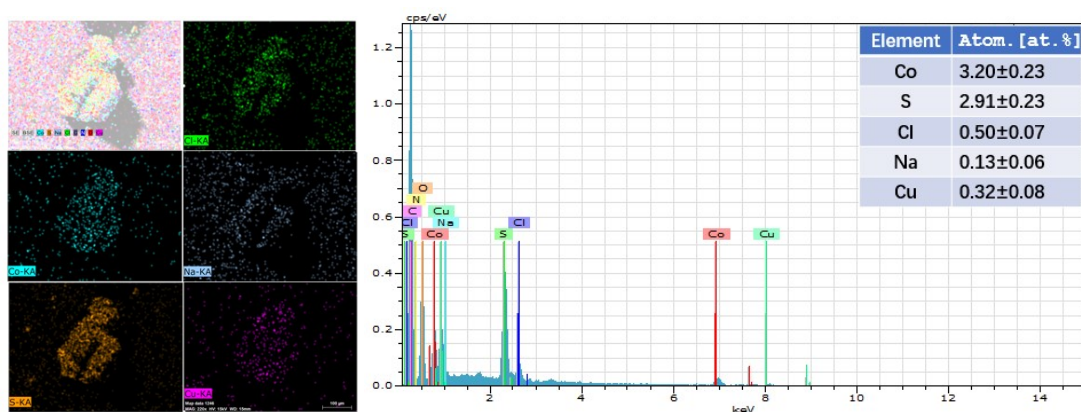

**Fig. S12** The EDS pattern of Cu@Co<sub>24</sub>-after 4 cycles of photocatalysis

The EDS mapping shows the elements are in the same region, and the ratios of the elements are accordant with that from SCXRD.

## Tables

**Table S1** Crystal data and structure refinement parameters for Na@Co<sub>24</sub> and Cu@Co<sub>24</sub>

| Compound                                               | Na@Co <sub>24</sub>                                                                                                            | Cu@Co <sub>24</sub>                                                                                                                |
|--------------------------------------------------------|--------------------------------------------------------------------------------------------------------------------------------|------------------------------------------------------------------------------------------------------------------------------------|
| Formula                                                | C <sub>416.5</sub> H <sub>560.5</sub> Cl <sub>6</sub> Co <sub>24</sub> N <sub>45.5</sub> Na <sub>4</sub> O <sub>117.50</sub> S | C <sub>334.50</sub> H <sub>337</sub> Cl <sub>82.50</sub> Co <sub>24</sub> Cu <sub>2.50</sub> N <sub>8</sub> NaO <sub>84.50</sub> S |
| Mr                                                     | <sup>24</sup><br>10572.99                                                                                                      | <sup>24</sup><br>11111.33                                                                                                          |
| Crystal system                                         | Tetragonal                                                                                                                     | Tetragonal                                                                                                                         |
| space group                                            | <i>I</i> 4/m                                                                                                                   | <i>I</i> 4/m                                                                                                                       |
| <i>a</i> (Å)                                           | 25.7160(11)                                                                                                                    | 25.981(3)                                                                                                                          |
| <i>b</i> (Å)                                           | 25.7160(11)                                                                                                                    | 25.981(3)                                                                                                                          |
| <i>c</i> (Å)                                           | 43.4014(19)                                                                                                                    | 43.544(5)                                                                                                                          |
| $\alpha(^{\circ})$                                     | 90                                                                                                                             | 90                                                                                                                                 |
| $\beta(^{\circ})$                                      | 90                                                                                                                             | 90                                                                                                                                 |
| $\gamma(^{\circ})$                                     | 90                                                                                                                             | 90                                                                                                                                 |
| Volume (Å <sup>3</sup> )                               | 28702(3)                                                                                                                       | 29393(8)                                                                                                                           |
| Z                                                      | 2                                                                                                                              | 2                                                                                                                                  |
| Temperature(K)                                         | 150                                                                                                                            | 150                                                                                                                                |
| <i>D<sub>c</sub></i> (g/cm <sup>3</sup> ) <sup>c</sup> | 1.223                                                                                                                          | 1.255                                                                                                                              |
| $\mu$ (mm <sup>-1</sup> )                              | 0.860                                                                                                                          | 1.259                                                                                                                              |
| Total reflections collected                            | 54017                                                                                                                          | 52338                                                                                                                              |
| Unique data                                            | 0.062                                                                                                                          | 0.056                                                                                                                              |
| ( <i>R<sub>int</sub></i> )                             |                                                                                                                                |                                                                                                                                    |
| <i>GOF</i> on <i>F</i> <sup>2</sup>                    | 1.04                                                                                                                           | 1.00                                                                                                                               |
| <i>R</i> <sub>1</sub> [ <i>I</i> >2sigma( <i>I</i> )]  | 0.0836                                                                                                                         | 0.0728                                                                                                                             |
| <i>a</i>                                               |                                                                                                                                |                                                                                                                                    |
| <i>wR</i> <sub>2</sub> <sup>b</sup>                    | 0.2848                                                                                                                         | 0.2482                                                                                                                             |

$$^aR_1 = \Sigma||F_0|-|F_c||/\Sigma|F_0|; ^b wR_2 = \{\Sigma[w(F_0^2-F_c^2)^2]/\Sigma[w(F_0^2)^2]\}^{1/2}$$

**Table S2** The atom ratio of the as-synthesized Cu@Co<sub>24</sub> and Cu@Co<sub>24</sub>-after photocatalysis calculated from inductively coupled plasma (ICP) measurements

| Complex                                   | Co (ppm) | Cu (ppm) | Co: Cu (molar ratio) | Experimental value                  |
|-------------------------------------------|----------|----------|----------------------|-------------------------------------|
| Cu@Co <sub>24</sub>                       | 824.60   | 86.45    | 9.54:1               | Co <sub>24</sub> Cu <sub>2.52</sub> |
| Cu@CO <sub>24</sub> -after photocatalysis | 1024.36  | 107.15   | 9.56:1               | Co <sub>24</sub> Cu <sub>2.51</sub> |

**Table S3** Comparison of the performances with some Cu-based or Co-based catalysts for photocatalytic reduction CO<sub>2</sub> to CO

| Catalyst                                               | Reaction condition                                    | Sacrificial agent | Photosensitizer                        | CO product                  | CO selectivity | Gas by-product      | Refs.                                                              |
|--------------------------------------------------------|-------------------------------------------------------|-------------------|----------------------------------------|-----------------------------|----------------|---------------------|--------------------------------------------------------------------|
| Cu@Co <sub>24</sub>                                    | Gas-solid with water vapor                            | none              | none                                   | 8.54 $\mu\text{mol/g/h}$    | 100%           | n.d                 | This work                                                          |
| MAF-34-CoRu                                            | Gas-solid with water vapor                            | none              | none                                   | 5.43 $\mu\text{mol/g/h}$    | 89.2%          | CH <sub>4</sub>     | <i>J. Am. Chem. Soc.</i> , 2022, <b>144</b> , 8676-8682.           |
|                                                        | Gas-solid with water vapor (Diluted CO <sub>2</sub> ) | none              | none                                   | 4.26 $\mu\text{mol/g/h}$    | 95.5%          | CH <sub>4</sub>     |                                                                    |
|                                                        | CH <sub>3</sub> CN/H <sub>2</sub> O                   | none              | none                                   | 11.2 $\mu\text{mol/g/h}$    | 100%           | n.d                 |                                                                    |
| CuTCPP@UiO-66/TiO <sub>2</sub>                         | Gas-solid with water vapor (CO <sub>2</sub> 0.1 MPa)  | none              | none                                   | 31.32 $\mu\text{mol/g/h}$   | n.r            | CH <sub>4</sub>     | <i>Sci Bull.</i> , 2019, <b>64</b> , 926-933.                      |
| Cu <sub>0.7</sub> -ZnIn <sub>2</sub> S <sub>4</sub>    | Gas-solid with water vapor                            | none              | none                                   | 47.2 $\mu\text{mol/g/h}$    | 74.8%          | H <sub>2</sub>      | <i>ACS Sustainable Chem. Eng.</i> , 2022, <b>10</b> , 11902-11912. |
| Cu <sub>2</sub> O@Cu@UiO-66-NH <sub>2</sub>            | Gas-solid                                             | TEOA              | none                                   | 20.9 $\mu\text{mol/g/h}$    | n.r            | CH <sub>4</sub>     | <i>ACS Appl. Nano Mater.</i> , 2020, <b>3</b> , 10437-10445.       |
| Co <sub>6</sub> -MOF                                   | CH <sub>3</sub> CN-H <sub>2</sub> O                   | TEOA              | [Ru(bpy) <sub>3</sub> ]Cl <sub>2</sub> | 39.36 $\mu\text{mol}$ (3 h) | n.r            | H <sub>2</sub>      | <i>J. Mater. Chem. A.</i> , 2017, <b>5</b> , 12498-12505.          |
| Co(bpy) <sub>2</sub> Cl <sub>2</sub>                   | CH <sub>3</sub> CN-H <sub>2</sub> O                   | TEOA,             | [Ru(bpy) <sub>3</sub> ]Cl <sub>2</sub> | 62.3 $\mu\text{mol}$ (4 h)  | n.r            | H <sub>2</sub>      | <i>J. Energy. Chem.</i> , 2018, <b>27</b> , 502-506.               |
| Co-dca                                                 | CH <sub>3</sub> CN                                    | TEOA              | [Ru(bpy) <sub>3</sub> ]Cl <sub>2</sub> | 254 $\mu\text{mol/g/h}$     | 93%            | H <sub>2</sub>      | <i>Dalton Trans.</i> , 2022, <b>51</b> , 12569-12575.              |
| [Cu <sub>6</sub> [BH(im) <sub>3</sub> ] <sub>8</sub> ] | CH <sub>3</sub> CN-H <sub>2</sub> O                   | TEOA              | [Ru(bpy) <sub>3</sub> ]Cl <sub>2</sub> | 3334 $\mu\text{mol/g/h}$    | 82.6%          | H <sub>2</sub>      | <i>Angew. Chem., Int. Ed.</i> , 2019, <b>58</b> , 11752-11756.     |
| 0.5%Cu/TiO <sub>2</sub> -SiO <sub>2</sub>              | Gas-solid with water vapor (CO <sub>2</sub> 0.1 MPa)  | none              | none                                   | 60 $\mu\text{mol/g/h}$      | n.r            | CH <sub>4</sub>     | <i>Appl Cata B- Environ.</i> , 2010, <b>100</b> , 386-392.         |
| Co-ZIF-9/TiO <sub>2</sub>                              | Gas-solid with water vapor (CO <sub>2</sub> 70 kPa)   | none              | none                                   | 17.58 $\mu\text{mol/g/h}$   | 79.3%          | CO, CH <sub>4</sub> | <i>J. Mater. Chem. A</i> , 2016, <b>4</b> , 15126                  |

n.r = not reported; n.d = not detected
